# Supplementary material
Source: PubMed Central journal article supplement (PMC6035155)
Supplement: mmc1.pdf [file mmc1.pdf]

**The American Journal of Human Genetics, Volume 103**

**Supplemental Data**

**Using Somatic Mutations from Tumors  
to Classify Variants in Mismatch Repair Genes**

**Brian H. Shirts, Eric Q. Konnick, Sarah Upham, Tom Walsh, John Michael O. Ranola, Angela L. Jacobson, Mary-Claire King, Rachel Pearlman, Heather Hampel, and Colin C. Pritchard**

**Supplemental Tables:**

Table S1: Z-score calculations for changes at canonical splice sites defined by MaxEnt score distributions for all MMR genes

See Excel file.

Table S2: Variant counts used to derive likelihood ratios where loss of heterozygosity is observed and where no loss of heterozygosity is observed

*Loss of heterozygosity present, variant read fraction cutoff = 0.8*

| All tumors                            | Below | Above |
|---------------------------------------|-------|-------|
| Known Pathogenic and Loss of Function | 7     | 37    |
| Intronic                              | 244   | 8     |

| Colorectal only                       | Below | Above |
|---------------------------------------|-------|-------|
| Known Pathogenic and Loss of Function | 4     | 28    |
| Intronic                              | 155   | 6     |

| Endometrial only                      | Below | Above |
|---------------------------------------|-------|-------|
| Known Pathogenic and Loss of Function | 2     | 9     |
| Intronic                              | 71    | 2     |

*No loss of heterozygosity present, variant read fraction cutoff = 0.35*

|                                       | Below | Above |
|---------------------------------------|-------|-------|
| Known Pathogenic and Loss of Function | 9     | 100   |
| Intronic                              | 209   | 299   |

|                                       | Below | Above |
|---------------------------------------|-------|-------|
| Known Pathogenic and Loss of Function | 2     | 41    |
| Intronic                              | 43    | 82    |

|                                       | Below | Above |
|---------------------------------------|-------|-------|
| Known Pathogenic and Loss of Function | 6     | 53    |
| Intronic                              | 164   | 215   |

Table S3: Multifactorial likelihood calculations for 165 variants in *MLH1*, *MSH2*, *MSH6*, and *PMS2*  
See Excel file.
